# Association between CYP1A1 Ile462Val Variation and Acute Leukemia Risk: Meta-Analyses Including 2164 Cases and 4160 Controls

Wenlei Zhuo<sup>1\*</sup>, Liang Zhang<sup>2</sup>, Bo Zhu<sup>1</sup>, Zhiqun Qiu<sup>2</sup>, Zhengtang Chen<sup>1</sup>

**1** Institute of Cancer, Xinqiao Hospital, Third Military Medical University, Chongqing, China, **2** Department of Environmental Hygiene, College of Preventive Medicine, Third Military Medical University, Chongqing, China

## Abstract

**Background:** Previously, CYP1A1 Ile462Val polymorphism has been indicated to be a risk factor for several malignancies. Increasing reports have focused on the association of CYP1A1 Ile462Val polymorphisms with susceptibility to acute leukemia and have generated controversial results. The goal of the present study was to derive a more precise estimation of the relationship.

**Methods:** Relevant literature has been rigorously searched and screened. Eligible studies were identified for the period up to Apr 2012. Meta-analyses evaluating the association of CYP1A1 Ile462Val variation with acute leukemia were carried out. Subgroup analyses on ethnicity, clinical types and source of controls were further performed.

**Results:** A total of thirteen publications including fourteen case-control studies with 2164 cases and 4160 controls were selected for analysis. The overall data indicated a significant association of CYP1A1 Ile462Val polymorphism with acute leukemia risk (Val/Val vs Ile/Ile OR = 1.49; 95% CI = 1.11–1.98; dominant model: OR = 1.26; 95% CI = 1.05–1.51; recessive model: OR = 1.38; 95% CI = 1.04–1.83). In subgroup analysis on ethnicity, increased risk was shown among mixed ethnicities (Val/Val vs Ile/Ile: OR = 2.36; 95% CI = 1.46–3.82; dominant model: OR = 1.37; 95% CI = 1.01–1.86; recessive model: OR = 2.20; 95% CI = 1.37–3.53) but not Asians or Caucasians. In subgroup analysis on clinical types, increased risk was observed in the acute lymphocytic leukemia (ALL) subgroup (Val/Val vs Ile/Ile: OR = 2.06; 95% CI = 1.42–3.01; recessive model: OR = 1.91; 95% CI = 1.32–2.76) but not in the acute myeloid leukemia (AML) subgroup.

**Conclusion:** The results of the present study suggest that CYP1A1 Ile462Val polymorphism might be a low-penetrant risk factor for acute leukemia. Subgroup analyses suggest that homozygous Val/Val alleles might modify the susceptibility to ALL.

**Citation:** Zhuo W, Zhang L, Zhu B, Qiu Z, Chen Z (2012) Association between CYP1A1 Ile462Val Variation and Acute Leukemia Risk: Meta-Analyses Including 2164 Cases and 4160 Controls. PLoS ONE 7(10): e46974. doi:10.1371/journal.pone.0046974

**Editor:** Javier S. Castresana, University of Navarra, Spain

**Received:** May 11, 2012; **Accepted:** September 10, 2012; **Published:** October 4, 2012

**Copyright:** © 2012 Zhuo et al. This is an open-access article distributed under the terms of the Creative Commons Attribution License, which permits unrestricted use, distribution, and reproduction in any medium, provided the original author and source are credited.

**Funding:** The authors have no support or funding to report.

**Competing Interests:** The authors have declared that no competing interests exist.

\* E-mail: zhuowenlei@yahoo.com.cn

## Introduction

Acute leukemia, a malignant tumor of the hematopoietic system, is characterized by a rapid increase in the numbers of immature blood cells. The disease can be subdivided into two major groups according to the cell affected as acute lymphoblastic leukemia (ALL) and acute myeloid leukemia (AML), respectively. ALL is the most common type of leukemia in young children while AML occurs more commonly in adults than in children [1,2]. The mechanisms for acute leukemia genesis are not fully understood. Previous evidence suggests that radiation, smoking, obesity and exposure to chemical carcinogens are considered as its risk factors [3]. Nevertheless, though individuals are exposed to these environmental and lifestyle risk factors, acute leukemia develops only in a small proportion of the exposed people, indicating that the host genetic factors might play an important role in the genesis of leukemia.

Several genetic variations have been evaluated as possible risk factors for leukemia by meta-analyses. Polymorphisms of GSTM1, GSTT1, MTHFR C677T and XRCC1 Arg399Gln have been indicated to increase leukemia risk [4,5,6]. However, significant associations of polymorphic MTR A2756G with decreased acute leukemia susceptibility were found [7]. Thus, different genetic polymorphisms exert different effects on acute leukemia risk. Nevertheless, only a few gene polymorphisms associated with leukemia susceptibility have been identified. To explore the roles of other genetic polymorphisms on the risk is required.

Previous evidence indicates that carcinogen-metabolizing genes may play critical roles in determining individual susceptibility to malignancies [8,9]. Genetic variations in these genes may change the activities of their encoded enzymes, possibly by altering their expression and function. Cytochrome P450 enzymes catalyze Phase I metabolism reaction. Cytochrome P450 1A1 (CYP1A1) is a member of the CYP1 family that participates in the metabolism

of xenobiotics and endogenous compounds, particularly polycyclic aromatic hydrocarbons (PAHs) such as benzo[a]pyrene [10]. A commonly investigated single nucleotide polymorphism (SNP) in the CYP1A1 gene has been suggested to have a correlation with cancer risk. The SNP leads to a base substitution of isoleucine with valine at codon 462 in exon7 (Ile462Val or CYP1A1\*2C polymorphism, rs1048943). Thus, the exon7 restriction site polymorphism results in three genotypes: a predominant homozygous Ile/Ile, the heterozygote Ile/Val and a rare homozygous Val/Val [11].

A number of published studies have been conducted on the relationship between CYP1A1 Ile462Val polymorphism and acute leukemia risk. However, the results are inconclusive. The issue of whether the CYP1A1 Ile462Val polymorphism is a risk factor for acute leukemia has not been clearly addressed. Thus, in this study we aimed to derive a more precise estimation of the relationship by performing a quantitative meta-analysis that increases statistical power to reach more convincing results.

## Materials and Methods

### 1 Literature search Strategy

To obtain eligible literature, we carried out a search in the Medline, EMBASE, OVID, Scencedirect, Google Scholar and Chinese National Knowledge Infrastructure (CNKI) without a language limitation, covering published publications up to Apr 2012, with a combination of the following keywords: *Cytochrome P450 1A1*, *CYP1A1*, *Ile462Val*, *exon7*, *acute leukemia*, *hematology*, *malignancy*, *neoplasm*, *cancer*, *variation* and *polymorphism*. All searched studies were retrieved and the bibliographies were checked for other relevant publications. Review articles and bibliographies of other relevant studies identified were electric/hand searched to find additional eligible studies.

### 2 Inclusion and Exclusion Criteria

The following criteria were used for the literature selection: first, studies should concern the association of CYP1A1 Ile462Val polymorphism with acute leukemia risk; second, studies must be observational studies (Case-control or cohort); third, papers must offer the sample size, odds ratios (ORs) and their 95% confidence intervals (CIs), the genetic distribution or the information that can help infer the needed results. Accordingly, the following criteria for exclusion were also used: first, the design and the definition of the experiments were obviously different from those of the selected articles; second, the source of cases and controls and other essential information were not offered; third, reviews and duplicated publications. After rigorous searching, we reviewed all papers in accordance with the criteria defined above for further analysis.

### 3 Data Extraction

Data were carefully extracted from all eligible publications independently by two of the authors (Zhuo and Zhang) according to the inclusion criteria mentioned above. For conflicting evaluations, an agreement was reached following a discussion. If a consensus could not be reached, another author was consulted to resolve the dispute and then a final decision was made by the majority of the votes. The extracted information was entered into a database.

### 4 Statistical Analysis

The odds ratio (OR) of CYP1A1 Ile462Val polymorphisms and acute leukemia risk was estimated for each study. The pooled ORs were performed for a homozygote comparison model (Val/Val

versus Ile/Ile), a dominant model (Val/Val+Val/Ile versus Ile/Ile) and a recessive model (Val/Val versus Val/Ile+Ile/Ile), respectively. To detect any possible sample size biases, the OR and its 95% confidence interval (CI) to each study was plotted against the number of participants respectively.  $I^2$  value was applied to evaluate heterogeneity between the included studies ( $I^2 = 0-25\%$ , no heterogeneity;  $I^2 = 25-50\%$ , moderate heterogeneity;  $I^2 > 50\%$ , large heterogeneity) [12]. In addition, a Chi-square based Q statistic test was conducted to assess the heterogeneity. If the result of the Q-test was  $P > 0.1$ , ORs were pooled according to the fixed-effect model (Mantel-Haenszel), Otherwise, the random-effect model (DerSimonian and Laird) was used. The significance of the pooled ORs was determined by Z-test. The Hardy-Weinberg equilibrium (HWE) was assessed by Fisher's exact test. Publication bias was assessed by visual inspection of funnel plots [13], in which the standard error of log (OR) of each study was plotted against its log (OR). An asymmetric plot indicates a possible publication bias. The symmetry of the funnel plot was further evaluated by Egger's linear regression test [14]. Statistical analysis was undertaken using the program STATA 11.0 software (Stata Corporation, Texas, USA).

## Results

### 1 Study Characteristics

Relevant publications were retrieved and screened carefully. A total of ninety-six publications were identified, of which seventy-three irrelevant papers were excluded. As shown in **Figure 1**, twenty-three publications were preliminary eligible, of which two review articles [15,16] and one publication without detailed subtypes of leukemia [17] were then excluded. Next, three publications not being case-control studies [18,19,20] and one article without sufficient data [21] were discarded. As a result, sixteen publications were selected for data extraction. However, three duplicate publications [16,22,23] which concerned the same research with one selected study [24] were further excluded. Moreover, an included article provided two separated groups of data regarding childhood leukemia and adult leukemia, respectively [25]. Thus, each group was considered as a separate study for analysis. Lastly, thirteen publications containing fourteen case-control studies were selected [24,25,26,27,28,29,30,31,32,33,34,35,36].

Of the selected publications, one publication was written in Chinese [26] while the remaining twelve were in English. The relevant information was listed in **Table 1**. According to this table, the first author and the number and characteristics of cases and controls for each study as well as other necessary information were presented. There were three groups of Caucasians [24,27,34], five of Asians [26,29,31,32,36] and six of mixed ethnicities [25,28,30,33,35] in this meta-analysis. As shown in **Table 1**, five groups of AML [25,27,31,33,36] and nine of ALL [24,25,26,28,29,30,32,34,35] were included in this study. As for age groups, there were eight childhood ALL [24,25,26,29,30,32,34,35] and one adult ALL [28] groups in this study. All AML studies concerned adult AML.

The distributions of CYP1A1 Ile462Val genotypes as well as the genotyping methods of the included studies were presented in **Table 2**. The genetic distributions of the control groups in all studies were consistent with HWE except for one study [35].

### 2 Test of Heterogeneity

As shown in **Table 3**, evident heterogeneities were observed for the overall data in the dominant model ( $P = 0.049$  for Q-test;

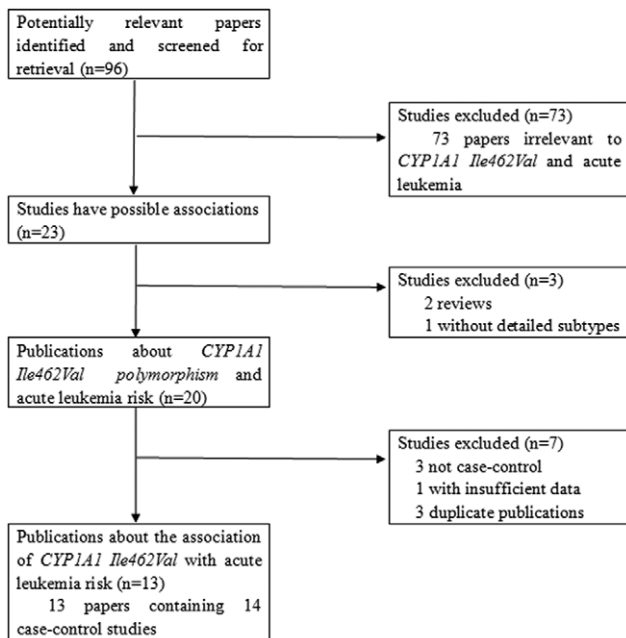

**Figure 1. The flow diagram of included/excluded studies.**  
doi:10.1371/journal.pone.0046974.g001

$I^2 = 42.1\%$ ), except for the homozygote comparison ( $P = 0.171$  for  $Q$ -test;  $I^2 = 27.9\%$ ) and the recessive models ( $P = 0.247$  for  $Q$ -test;  $I^2 = 20.1\%$ ). However, when subgroup analyses on ethnicity, clinical types and source of controls were further conducted, we found diminished heterogeneities in some of the subgroups under the dominant model.

### 3 Meta-analysis Results

The main results of the meta-analysis were listed in **Table 3**. For the overall data containing 2164 cases and 4160 controls, significant associations of CYP1A1 Ile462Val polymorphism with acute leukemia risk were shown under the homozygote comparison (OR = 1.49; 95%CI = 1.11–1.98), the dominant (OR = 1.26; 95%CI = 1.05–1.51) (**Figure 2**) and the recessive (OR = 1.38; 95%CI = 1.04–1.83;  $P = 0.247$  for heterogeneity) models, indicating that individuals carrying the variant Val allele may have an increased acute leukemia risk compared with those bearing the wild-type Ile allele.

Considering the potential impact of the confounding factors on the overall results, we further conducted subgroup analyses. In the primary literature, only the detailed information on ethnicity, clinical types and source of controls were sufficient for analysis. Therefore, subgroup analyses on these issues were performed. In subgroup analysis according to ethnicity, increased leukemia risks were observed in the three genetic models among mixed ethnicities (homozygote comparison: OR = 2.36; 95%CI = 1.46–3.82; dominant: OR = 1.37; 95%CI = 1.01–1.86; recessive: OR = 2.20; 95%CI = 1.37–3.53) but not Caucasians or Asians (**Figure 3**). In subgroup analyses regarding clinical types, increased risks for ALL were found under the homozygote comparison (OR = 2.06; 95%CI = 1.42–3.01) and the recessive models (OR = 1.91; 95%CI = 1.32–2.76), respectively. When the data regarding ALL were separated by age groups, significant increased risk could be observed in both adult ALL and childhood ALL. No significant associations were shown in subgroup regarding AML under the three genetic models (**Figure 4**). In subgroup analysis on source of controls, elevated risks were observed in the population-based

subgroup (homozygote comparison: OR = 1.44; 95%CI = 1.05–1.96; dominant: OR = 1.23; 95%CI = 1.04–1.46) rather than the hospital-based subgroup (**Figure 5**).

### 4 Sensitivity Analysis

When the effect-models were changed, the significance of the overall data for the three models was not statistically altered (data not shown). Then, we discarded one study whose genetic distributions in controls exhibited significant deviation from HWE [35], given that the deviation might lead to any bias [37]. The significances of the overall data in the three models, respectively, were also not statistically changed. Then, one-way sensitivity analysis [38] was carried out to assess the stability of the meta-analysis. The statistical significance of the results was not changed when any single study was deleted (data not shown), indicating the credibility of the results.

### 5 Bias Diagnostics

Funnel plots were created to assess the publication bias. Then, Egger's linear regression tests were used to assess the symmetries of the plots. The funnel plots seemed symmetrical for the overall data of the three genetic models (**Figure 6a**). Additionally, the data of the Egger's tests also indicate the absence of the publication bias in the three models, respectively (homozygote comparison model:  $t = 0.68$ ,  $P > 0.05$ ; dominant model:  $t = 0.98$ ,  $P > 0.05$ ; recessive model:  $t = 0.58$ ,  $P > 0.05$ ) (**Figure 6b**), suggesting that the results of the meta-analyses are relatively stable and the potential publication bias might not have an evident influence on the results.

### Discussion

For the overall data, the results showed that CYP1A1 Ile462Val might have a marked correlation with increased acute leukemia risk. Moreover, in subgroup analyses stratified by ethnicity, the data failed to reveal an association among either Asians or Caucasians, but mixed ethnicities. In subgroup analysis according to clinical types, the results indicated that Val/Val alleles might increase susceptibility to ALL.

The relations of CYP1A1 Ile462Val variations with cancer risk have been evaluated by several meta-analyses. CYP1A1 Ile462Val polymorphism might have a correlation with increased risks of lung cancer, cervical cancer, colorectal cancer, esophageal cancer and breast cancers [39,40,41,42,43]. Nevertheless, for gastric cancer, prostate cancer and laryngeal cancers [44,45,46], such associations were not significant. Thus, CYP1A1 Ile462Val polymorphism might have different influences on different types of malignancies. Recently, a meta-analysis regarding the association of CYP1A1 MspI variation with childhood acute leukemia failed to reveal a significant association [47]. However, this meta-analysis focused on CYP1A1 MspI variation but not exon7 (Ile462Val) polymorphism. To our knowledge, the present meta-analysis for the first time shed light on the association between CYP1A1 Ile462Val polymorphism and acute leukemia risk.

In the subgroup analysis according to ethnicity, significant increased leukemia risk was found in the mixed races subgroup but not Asian and Caucasian subgroups, suggesting that CYP1A1 Ile462Val genetic variation may not confer acute leukemia risk among either Asians or Caucasians. Nevertheless, since we could not obtain the data regarding separate ethnicities from the mixed ethnicities subgroup, the possible effects of ethnicity variations on the results could not be precisely evaluated. Evidence suggested that gene polymorphisms could result in ethnic-specific susceptibility to leukemia [35]. In addition, environmental factors such as birth place and socioeconomic status may also play critical roles in

**Table 1.** Characteristics of studies included in the meta-analysis.

| First Author         | Publication Year | Number of Cases (male/female) | Number of Controls (male/female) | Subtypes of cases | Type of controls                                        | Median (or mean) age, (range) year (Cases/Controls) | Racial decent | Country |
|----------------------|------------------|-------------------------------|----------------------------------|-------------------|---------------------------------------------------------|-----------------------------------------------------|---------------|---------|
| Krajcinovic          | 1999             | 177 (110/67)                  | 304 (144/160)                    | 177 ALL           | Healthy controls (PB)                                   | 8(1–21)/NA                                          | Caucasian     | Canada  |
| Gao                  | 2003             | 78 (40/38)                    | 112 (58/54)                      | 78 ALL            | Healthy controls (PB)                                   | NA(2–15)/NA(3–15)                                   | Asian         | China   |
| D'Alo                | 2004             | 193 (107/86)                  | 273(147/126)                     | 193 AML           | Healthy controls (PB)                                   | 62(19–87)/60(19–90)                                 | Caucasian     | Italy   |
| Gallagos-Arreola     | 2004             | 136 (57/79)                   | 136 (66/70)                      | 136 ALL           | Healthy controls (PB)                                   | 37.5(18–78)/41.9(18–72)                             | Mixed         | Mexico  |
| Joseph               | 2004             | 118 (77/41)                   | 118 (77/41)                      | 118 ALL           | Non-cancer controls (age-, sex-matched; HB)             | NA(0–14)/NA(0–14)                                   | Asian         | India   |
| Selvin               | 2004             | 175 (NA)                      | 175 (NA)                         | 175 ALL           | Healthy controls (PB)                                   | NA(0–14)/NA(0–14)                                   | Mixed         | USA     |
| Majumdar             | 2008             | 110 (70/40)                   | 126 (54/72)                      | 110 AML           | Healthy controls (PB)                                   | 35(4–81)/30(8–73)                                   | Asian         | India   |
| Lee                  | 2009             | 164 (101/63)                  | 164 (101/63)                     | 106 ALL           | Non-cancer controls (age-, gender-matched; HB)          | 6.96(0–18)/7.09(0–18)                               | Asian         | Korea   |
| Yamaguti             | 2009             | 133 (70/63)                   | 133 (70/63)                      | 133 AML           | Healthy controls (PB)                                   | 47(11–89)/53(25–60)                                 | Mixed         | Brazil  |
| Yamaguti             | 2010             | 99 (52/47)                    | 99 (52/47)                       | 99 ALL            | Healthy controls (PB)                                   | 4(NA)/53(NA)                                        | Caucasian     | Brazil  |
| Razmkhah (Adult)     | 2011             | 144 (77/67)                   | 95 (52/43)                       | 105 AML           | Healthy controls (PB)                                   | 45.7(NA)/44.8(NA)                                   | Mixed         | Iran    |
| Razmkhah (Childhood) | 2011             | 85 (47/38)                    | 94 (53/41)                       | 85 ALL            | Healthy controls (PB)                                   | 5.6(0–16)/6.2(0–16)                                 | Mixed         | Iran    |
| Swinney              | 2011             | 258 (137/121)                 | 646 (NA)                         | 258 ALL           | Healthy controls (age-, gender-, ethnicity-matched; PB) | 6.3(NA)/NA                                          | Mixed         | USA     |
| Kim                  | 2012             | 415 (223/192)                 | 1700 (821/879)                   | 415 AML           | Healthy controls (PB)                                   | 50.5(15–86)/52.2(20–74)                             | Asian         | Korea   |

NA: not available; AML, acute myeloid leukemia; ALL, acute lymphocytic leukemia; PB: population-based; HB: hospital-based.  
doi:10.1371/journal.pone.0046974.t001

**Table 2.** Distribution of CYP1A1 Ile462Val genotype among acute leukemia cases and controls included in the meta-analysis.

| First Author         | Year | Genotyping method | Cases   |         |         | Controls |         |         | HWE (control) |       |
|----------------------|------|-------------------|---------|---------|---------|----------|---------|---------|---------------|-------|
|                      |      |                   | Val/Val | Val/Ile | Ile/Ile | Val/Val  | Val/Ile | Ile/Ile | Chi-square    | P     |
| Krajinovic           | 1999 | PCR-RFLP          | 1       | 11      | 158     | 0        | 24      | 275     | 0.523         | >0.05 |
| Gao                  | 2003 | ASA               | 10      | 44      | 24      | 11       | 59      | 42      | 2.226         | >0.05 |
| D'Alo                | 2004 | PCR-RFLP          | 0       | 14      | 179     | 0        | 25      | 248     | 0.629         | >0.05 |
| Gallegos-Arreola     | 2004 | PCR               | 22      | 65      | 49      | 8        | 59      | 69      | 1.010         | >0.05 |
| Joseph               | 2004 | PCR-RFLP          | 10      | 34      | 74      | 3        | 20      | 95      | 2.168         | >0.05 |
| Selvin               | 2004 | Not determined    | 5       | 39      | 131     | 4        | 44      | 127     | 0.007         | >0.05 |
| Majumdar             | 2008 | PCR-RFLP          | 1       | 24      | 85      | 3        | 18      | 105     | 3.687         | >0.05 |
| Lee                  | 2009 | SNaPshot          | 6       | 39      | 60      | 9        | 65      | 85      | 0.567         | >0.05 |
| Yamaguti             | 2009 | PCR-RFLP          | 4       | 54      | 75      | 2        | 39      | 92      | 0.891         | >0.05 |
| Yamaguti             | 2010 | PCR-RFLP          | 3       | 36      | 60      | 3        | 29      | 67      | 0.004         | >0.05 |
| Razmkhah (Adult)     | 2011 | PCR-RFLP          | 1       | 38      | 66      | 1        | 18      | 76      | 0.003         | >0.05 |
| Razmkhah (Childhood) | 2011 | PCR-RFLP          | 0       | 13      | 72      | 0        | 14      | 80      | 0.609         | >0.05 |
| Swinney              | 2011 | Golden gate assay | 14      | 40      | 188     | 18       | 118     | 505     | 10.693        | <0.05 |
| Kim                  | 2012 | PCR-RFLP          | 17      | 173     | 225     | 87       | 654     | 959     | 3.311         | >0.05 |

doi:10.1371/journal.pone.0046974.t002

**Table 3.** Main results of the pooled data in the meta-analysis.

|                    | No. (cases/<br>controls) | Val/Val vs Ile/Ile |       |            |                | (Val/Val+Val/Ile) vs Ile/Ile |       |            |                | Val/Val vs (Val/Ile+Ile/Ile) |       |            |                |
|--------------------|--------------------------|--------------------|-------|------------|----------------|------------------------------|-------|------------|----------------|------------------------------|-------|------------|----------------|
|                    |                          | OR (95%CI)         | P     | P (Q-test) | I <sup>2</sup> | OR (95%CI)                   | P     | P (Q-test) | I <sup>2</sup> | OR (95%CI)                   | P     | P (Q-test) | I <sup>2</sup> |
| Total              | 2164/4160                | 1.49 (1.11–1.98)   | 0.007 | 0.171      | 27.9%          | 1.26 (1.05–1.51)             | 0.011 | 0.049      | 42.1%          | 1.38 (1.04–1.83)             | 0.025 | 0.247      | 20.1%          |
| Clinical types     |                          |                    |       |            |                |                              |       |            |                |                              |       |            |                |
| ALL                | 1208/1833                | 2.06 (1.42–3.01)   | 0.000 | 0.448      | 0.0%           | 1.22 (0.96–1.54)             | 0.098 | 0.097      | 40.5%          | 1.91 (1.32–2.76)             | 0.001 | 0.601      | 0.0%           |
| AML                | 956/2327                 | 0.89 (0.55–1.44)   | 0.633 | 0.603      | 0.0%           | 1.35 (0.97–1.89)             | 0.076 | 0.061      | 55.6%          | 0.83 (0.51–1.34)             | 0.439 | 0.672      | 0.0%           |
| Age group (ALL)    |                          |                    |       |            |                |                              |       |            |                |                              |       |            |                |
| Adult ALL          | 136/136                  | 3.87 (1.59–9.41)   | 0.003 | –          | –              | 1.83 (1.13–2.97)             | 0.015 | –          | –              | 3.09 (1.32–7.21)             | 0.009 | –          | –              |
| Childhood ALL      | 1072/1697                | 1.76 (1.15–2.69)   | 0.009 | 0.638      | 0.0%           | 1.15 (0.91–1.45)             | 0.258 | 0.179      | 31.2%          | 1.68 (1.11–2.53)             | 0.015 | 0.701      | 0.0%           |
| Ethnicity          |                          |                    |       |            |                |                              |       |            |                |                              |       |            |                |
| Caucasian          | 462/671                  | 1.60 (0.39–6.55)   | 0.512 | 0.400      | 0.0%           | 1.01 (0.69–1.48)             | 0.945 | 0.418      | 0.0%           | 1.47 (0.37–5.95)             | 0.586 | 0.362      | 0.0%           |
| (ALL)              | 269/398                  | 1.60 (0.39–6.55)   | 0.512 | 0.400      | 0.0%           | 1.14 (0.72–1.79)             | 0.571 | 0.344      | 0.0%           | 1.47 (0.37–5.95)             | 0.586 | 0.362      | 0.0%           |
| (AML)              | 193/273                  | –                  | –     | –          | –              | 0.78 (0.39–1.53)             | 0.466 | –          | –              | –                            | –     | –          | –              |
| Asian              | 826/2215                 | 1.09 (0.74–1.61)   | 0.646 | 0.173      | 37.2%          | 1.29 (0.94–1.76)             | 0.115 | 0.072      | 53.6%          | 1.02 (0.70–1.49)             | 0.901 | 0.247      | 26.2%          |
| (ALL)              | 301/389                  | 1.73 (0.94–3.21)   | 0.080 | 0.221      | 33.8%          | 1.40 (0.76–2.59)             | 0.286 | 0.029      | 71.9%          | 1.57 (0.87–2.83)             | 0.138 | 0.327      | 10.6%          |
| (AML)              | 525/1826                 | 0.80 (0.47–1.35)   | 0.403 | 0.556      | 0.0%           | 1.13 (0.92–1.38)             | 0.256 | 0.393      | 0.0%           | 0.76 (0.45–1.27)             | 0.298 | 0.533      | 0.0%           |
| Mixed              | 876/1274                 | 2.36 (1.46–3.82)   | 0.000 | 0.642      | 0.0%           | 1.37 (1.01–1.86)             | 0.041 | 0.064      | 52.0%          | 2.20 (1.37–3.53)             | 0.001 | 0.791      | 0.0%           |
| (ALL)              | 638/1046                 | 2.41 (1.45–4.01)   | 0.001 | 0.323      | 11.6%          | 1.16 (0.85–1.60)             | 0.348 | 0.182      | 38.4%          | 2.28 (1.38–3.77)             | 0.001 | 0.523      | 0.0%           |
| (AML)              | 238/228                  | 2.00 (0.47–8.53)   | 0.348 | 0.651      | 0.0%           | 1.95 (1.31–2.90)             | 0.001 | 0.457      | 0.0%           | 1.64 (0.39–6.92)             | 0.502 | 0.628      | 0.05           |
| Source of controls |                          |                    |       |            |                |                              |       |            |                |                              |       |            |                |
| PB                 | 1941/3883                | 1.44 (1.05–1.96)   | 0.022 | 0.207      | 25.7%          | 1.23 (1.04–1.46)             | 0.015 | 0.178      | 27.2%          | 1.33 (0.98–1.81)             | 0.064 | 0.247      | 21.3%          |
| (ALL)              | 985/1556                 | 2.14 (1.39–3.29)   | 0.001 | 0.600      | 0.0%           | 1.17 (0.96–1.43)             | 0.118 | 0.424      | 0.0%           | 1.96 (1.29–2.97)             | 0.002 | 0.661      | 0.0%           |
| (AML)              | 956/2327                 | 0.89 (0.55–1.44)   | 0.633 | 0.603      | 0.0%           | 1.35 (0.97–1.89)             | 0.076 | 0.061      | 55.6%          | 0.83 (0.51–1.34)             | 0.439 | 0.672      | 0.0%           |
| HB                 | 223/277                  | 1.83 (0.83–4.02)   | 0.132 | 0.083      | 66.7%          | 1.44 (0.51–4.01)             | 0.489 | 0.008      | 85.9%          | 1.74 (0.80–3.82)             | 0.164 | 0.144      | 53.1%          |
| (ALL)              | 223/277                  | 1.83 (0.83–4.02)   | 0.132 | 0.083      | 66.7%          | 1.44 (0.51–4.01)             | 0.489 | 0.008      | 85.9%          | 1.74 (0.80–3.82)             | 0.164 | 0.144      | 53.1%          |
| (AML)              | –                        | –                  | –     | –          | –              | –                            | –     | –          | –              | –                            | –     | –          | –              |

AML, acute myeloid leukemia; ALL, acute lymphocytic leukemia; PB: population-based; HB: hospital-based.

doi:10.1371/journal.pone.0046974.t003

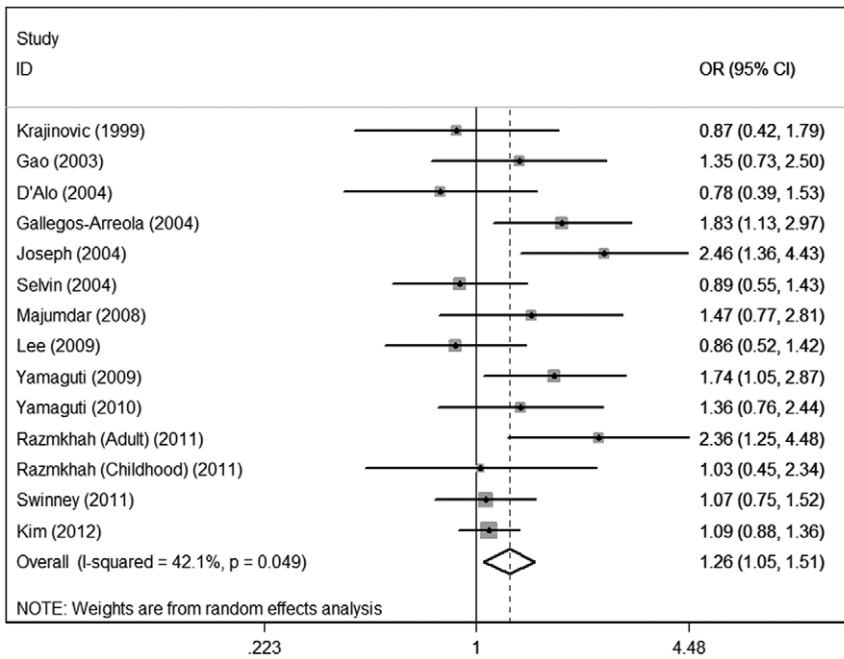

**Figure 2. Meta-analysis for the association of acute leukemia risk with CYP1A1 Ile462Val polymorphism for the overall data (Val/Val+Val/Ile versus Ile/Ile).**  
doi:10.1371/journal.pone.0046974.g002

the genesis of leukemia [48]. Therefore, possible racial disparities might exist. Further investigations regarding different ethnicities are needed to clarify this issue.

In the subgroup analysis stratified by clinical types, increased risk for ALL was shown under the homozygote comparison and the recessive models, suggesting that the homozygous Val/Val allele carriers might have an increased ALL risk relative to those of

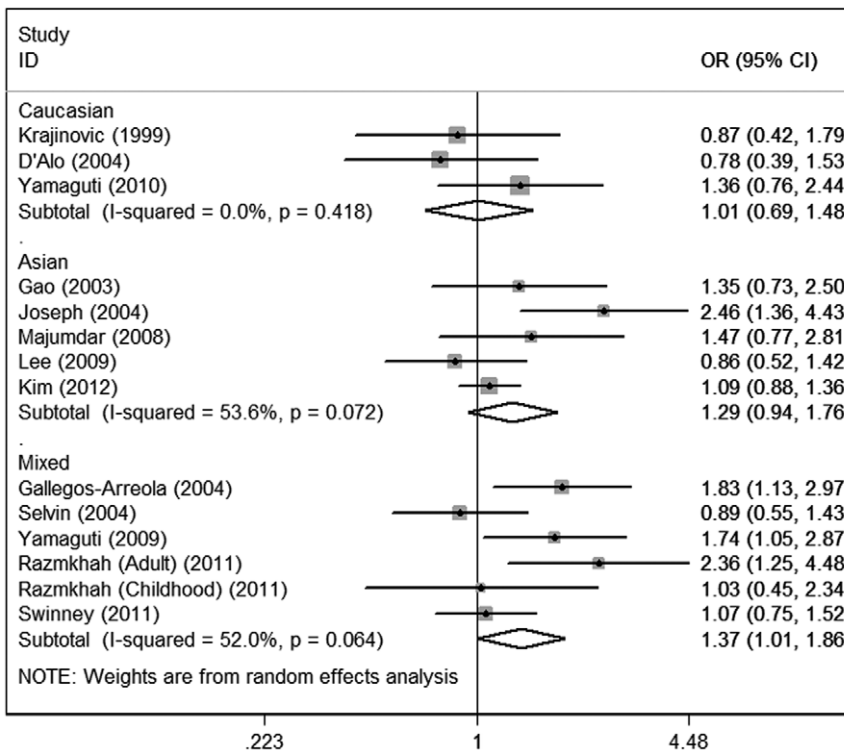

**Figure 3. Meta-analysis for the association of acute leukemia risk with CYP1A1 Ile462Val polymorphism (Val/Val+Val/Ile versus Ile/Ile; stratified by ethnicity).**  
doi:10.1371/journal.pone.0046974.g003

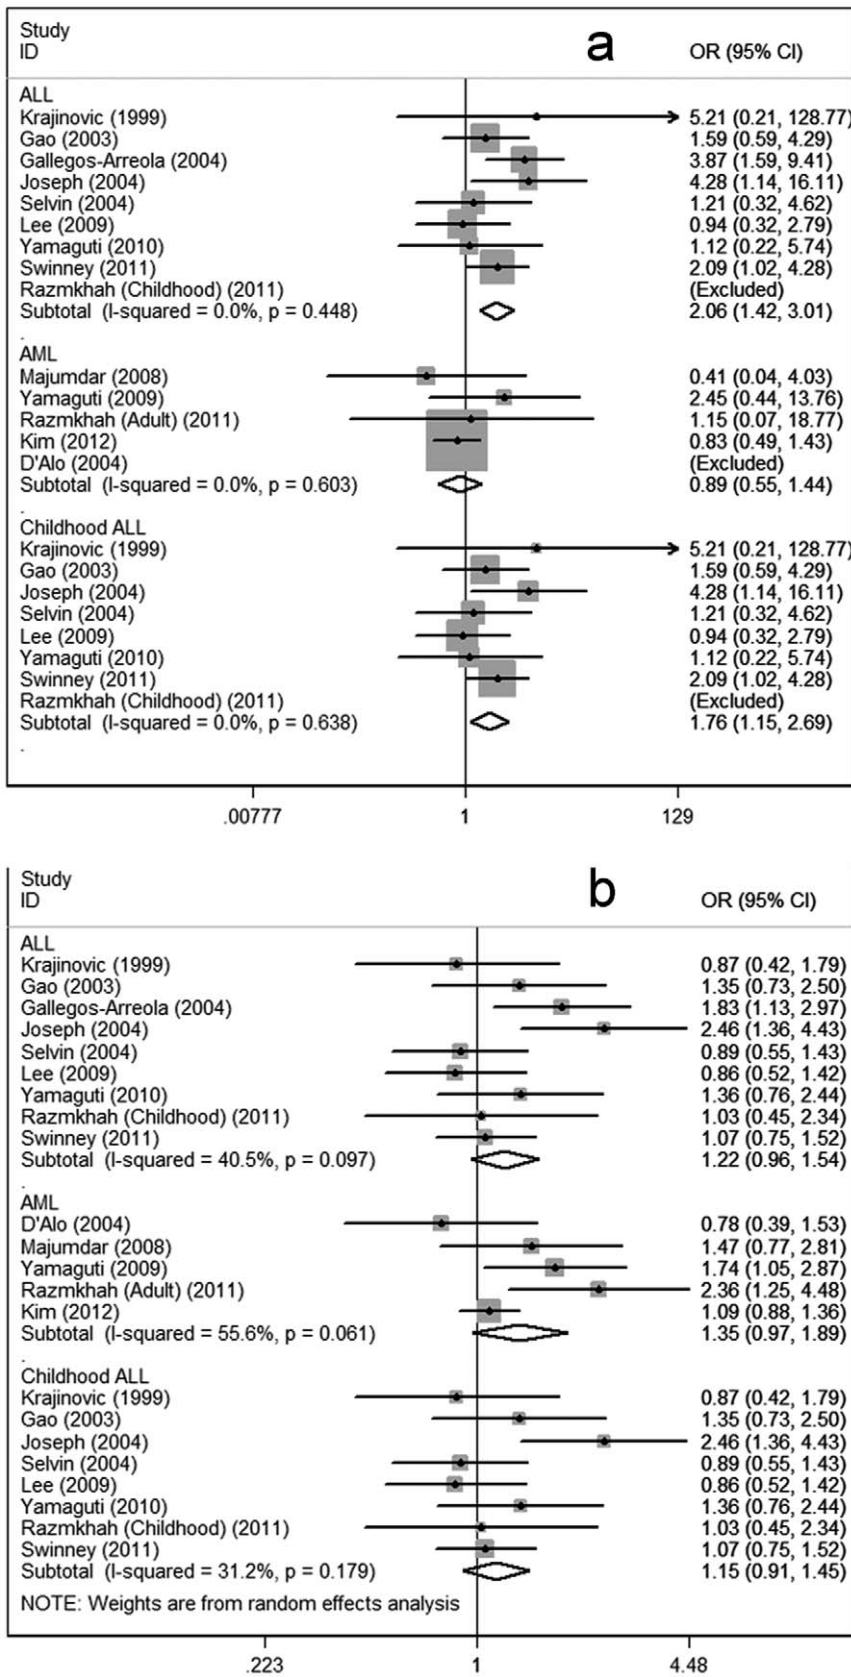

**Figure 4. Meta-analysis for the association of acute leukemia risk with CYP1A1 Ile462Val polymorphism stratified by clinical types.** (a) Val/Val versus Ile/Ile; (b) Val/Val+Val/Ile versus Ile/Ile; AML, acute myeloid leukemia; ALL, acute lymphocytic leukemia. doi:10.1371/journal.pone.0046974.g004

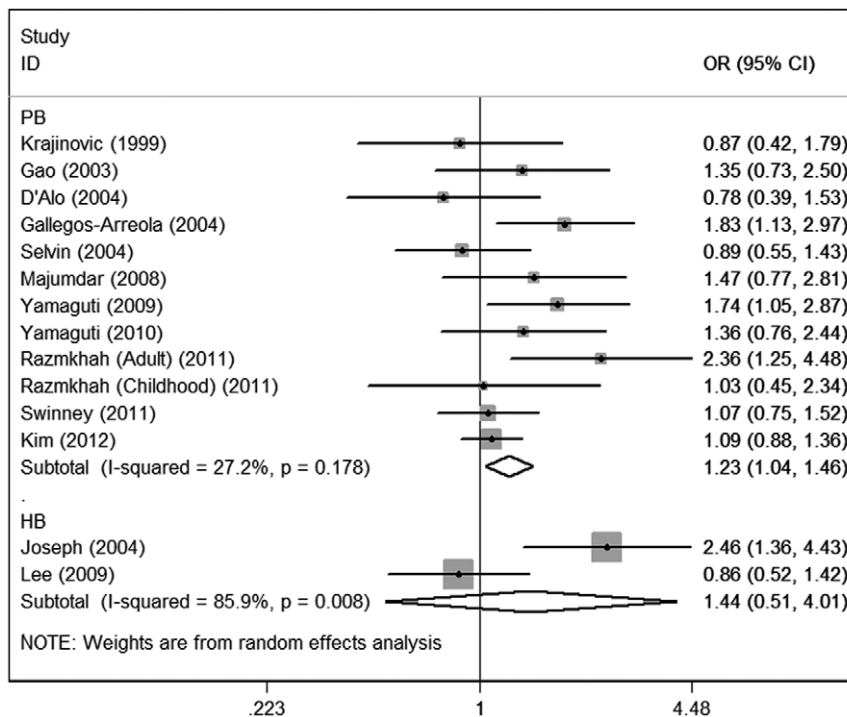

**Figure 5. Meta-analysis for the association of acute leukemia risk with CYP1A1 Ile462Val polymorphism stratified by source of controls (Val/Val+Val/Ile versus Ile/Ile).** PB: population-based; HB: hospital-based. doi:10.1371/journal.pone.0046974.g005

the wild-type Ile carriers. When the data about ALL were further divided by age groups, similar results were obtained in the two subgroups. However, only one study provided the information about adult ALL; thus, the results should be interpreted with care. As for AML, no associations could be observed. The disparity may be due to the different precise mechanisms involved in the genesis of different types of leukemia. ALL is a common childhood leukemia with poor outcomes [49], characterized by cytogenetic abnormalities, such as translocations and changes in ploidy. Parental exposure to specific chemicals and widely spread carcinogens may increase risk of childhood ALL [50,51]. Hence, variations of CYP1A1 Ile462Val may result in altered activities of the enzymes and the effects of carcinogens on the blood could thus be strengthened. Consequently, ALL risk might be increased.

Smoking and alcohol consumption are also important risk factors for leukemia. Evidence indicates that maternal smoking and drinking prior to and during pregnancy may increase risk of childhood leukemia, particularly ALL [52]. We tried to extract relevant information regarding smoking and drinking from the primary literature. However, insufficient data were obtained. Hence, relevant subgroup analyses have not been performed and further investigations concerning the interactions of smoking, drinking and gene variations on leukemia are required.

In the subgroup analysis according to source of controls, significance increased leukemia risk were observed in the population-based subgroup but not the hospital-based group. Since hospital-based controls might not be always truly representative of the general population, any biases might exist and the results should be interpreted with care. Therefore, use of proper control participants with strict matching criteria and large sample sizes are important for reducing such selection bias in future investigations.

In the present meta-analysis, both  $Q$ -tests and  $I$ -squared values were used to assess the heterogeneities. Evident between-study heterogeneities for overall data were observed in the dominant genetic model, and thus the random-effect models were utilized in this model. However, as shown in **Table 3**, in the subgroup analyses, removed or reduced heterogeneities were found in the relevant subgroups, implying that the heterogeneities may result from multi-factors; in addition to ethnicity and clinical types of leukemia, other factors such as selection of controls, gender, and prevalence of lifestyle factors might also lead to the heterogeneities.

Publication bias is an important factor that should be considered in a meta-analysis. We used funnel plots to evaluate the potential publication bias. Then, Egger's linear regression test was also used as an approach for assessment of the symmetries. The results failed to suggest evident bias in the three genetic models, suggesting little influences of the bias on the results and demonstrating the robustness and credibility of the present meta-analysis.

Several limitations should be addressed. First, in this meta-analysis, the primary articles only provided data about Caucasians, Asians and mixed ethnicities. Separate data regarding other ethnicities such as African should be concerned. Second, only studies written in English and Chinese were searched and included in this meta-analysis. Thus, any selection bias should be noted. Third, subgroup analyses regarding age, gender and other factors such as smoking, drinking and radiation exposure have not been conducted in the present study because relevant sufficient data were not available in the primary articles. Furthermore, among the fourteen included studies, only three studies provided the adjusted ORs [31,32,35]. We did not pool the adjusted ORs because the included studies either did not adjust for confounders, or the adjustments were not comparable among them. As the adjusted ORs are much more accurate than crude ORs but not



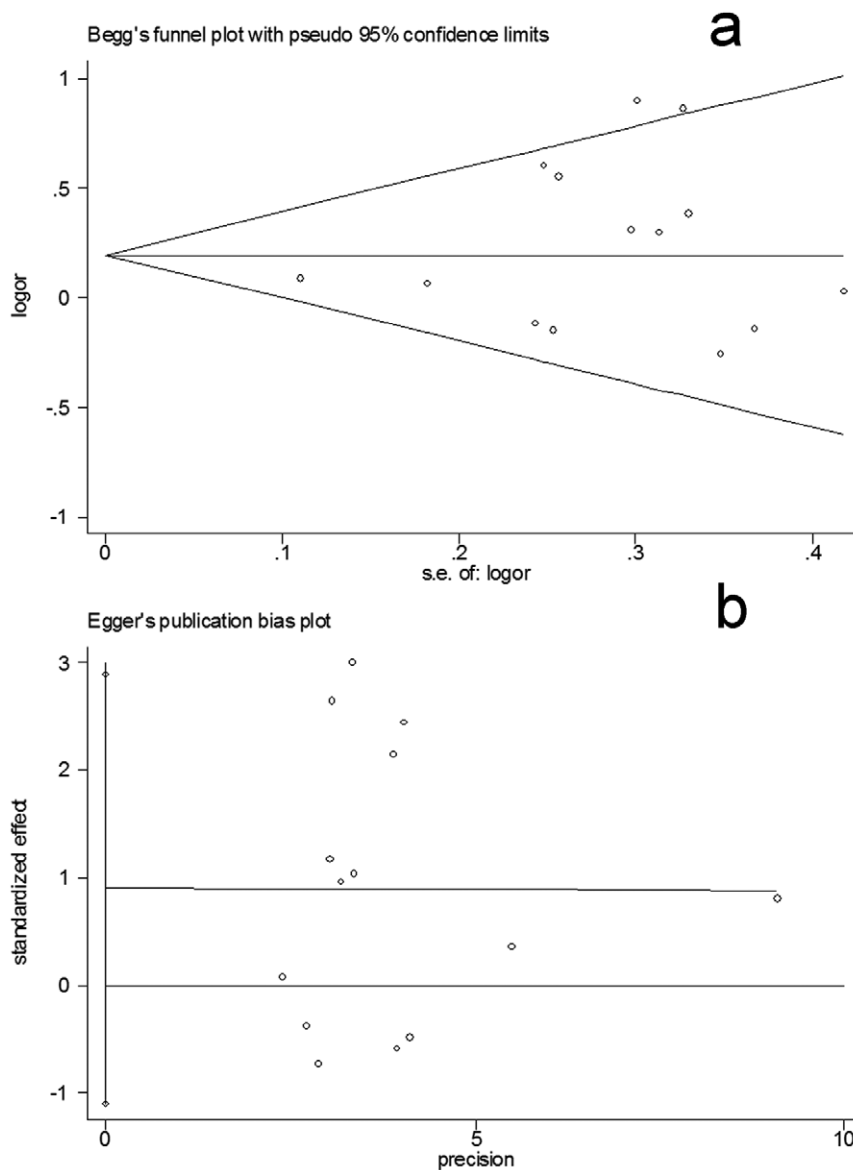

**Figure 6. Publication bias tests for the overall data (Val/Val+Val/Ile versus Ile/Ile).** (a): Funnel plot; (b) Egger's linear regression test. doi:10.1371/journal.pone.0046974.g006

available for most included studies, and adjusted factors differed across these studies, residual confounding might have affected the analysis. Therefore, the results should be interpreted with caution. Additionally, gene-gene and gene-environment interactions should also be considered in the further investigations.

In summary, the results of the present meta-analysis suggest that variant Val allele of CYP1A1 Ile462Val polymorphism might have an association with excess acute leukemia risk. Moreover, subgroup analyses indicate that homozygous Val/Val might

modify the susceptibility to ALL. Further well-designed investigations in view of the confounding factors are needed reach a more convincing conclusion.

### Author Contributions

Conceived and designed the experiments: WZ ZC. Performed the experiments: WZ LZ BZ. Analyzed the data: LZ BZ ZQ. Contributed reagents/materials/analysis tools: LZ BZ. Wrote the paper: WZ ZC.

### References

1. Meenaghan T, Dowling M, Kelly M (2012) Acute leukaemia: making sense of a complex blood cancer. *Br J Nurs* 21: 76–83.
2. Advani AS, Hunger SP, Burnett AK (2009) Acute leukemia in adolescents and young adults. *Semin Oncol* 36: 213–226.
3. Ilhan G, Karakus S, Andic N (2006) Risk factors and primary prevention of acute leukemia. *Asian Pac J Cancer Prev* 7: 515–517.
4. Yan J, Yin M, Dreyer ZE, Scheurer ME, Kamdar K, et al. (2012) A meta-analysis of MTHFR C677T and A1298C polymorphisms and risk of acute lymphoblastic leukemia in children. *Pediatr Blood Cancer* 58: 513–518.
5. Ye Z, Song H (2005) Glutathione s-transferase polymorphisms (GSTM1, GSTP1 and GSTT1) and the risk of acute leukaemia: a systematic review and meta-analysis. *Eur J Cancer* 41: 980–989.
6. Wang L, Yin F, Xu X, Hu X, Zhao D (2012) X-Ray Repair Cross-Complementing Group 1 (XRCC1) Genetic Polymorphisms and Risk of

- Childhood Acute Lymphoblastic Leukemia: A Meta-Analysis. *PLoS One* 7: e34897.
7. Yu K, Zhang J, Dou C, Gu S, Xie Y, et al. (2010) Methionine synthase A2756G polymorphism and cancer risk: a meta-analysis. *Eur J Hum Genet* 18: 370–378.
  8. Boffetta P (2010) Biomarkers in cancer epidemiology: an integrative approach. *Carcinogenesis* 31: 121–126.
  9. Klauing JE, Kamendulis LM, Hocevar BA (2010) Oxidative stress and oxidative damage in carcinogenesis. *Toxicol Pathol* 38: 96–109.
  10. Guengerich FP, Shimada T (1998) Activation of procarcinogens by human cytochrome P450 enzymes. *Mutat Res* 400: 201–213.
  11. Zhou SF, Liu JP, Chowbay B (2009) Polymorphism of human cytochrome P450 enzymes and its clinical impact. *Drug Metab Rev* 41: 89–295.
  12. Higgins JP, Thompson SG, Deeks JJ, Altman DG (2003) Measuring inconsistency in meta-analyses. *BMJ* 327: 557–560.
  13. Munafò MR, Clark TG, Flint J (2004) Assessing publication bias in genetic association studies: evidence from a recent meta-analysis. *Psychiatry Res* 129: 39–44.
  14. Egger M, Davey Smith G, Schneider M, Minder C (1997) Bias in meta-analysis detected by a simple, graphical test. *BMJ* 315: 629–634.
  15. Vijayakrishnan J, Houlston RS (2010) Candidate gene association studies and risk of childhood acute lymphoblastic leukemia: a systematic review and meta-analysis. *Haematologica* 95: 1405–1414.
  16. Sinnott D, Krajinovic M, Labuda D (2000) Genetic susceptibility to childhood acute lymphoblastic leukemia. *Leuk Lymphoma* 38: 447–462.
  17. Manuguerra M, Matullo G, Veglia F, Autrup H, Dunning AM, et al. (2007) Multi-factor dimensionality reduction applied to a large prospective investigation on gene-gene and gene-environment interactions. *Carcinogenesis* 28: 414–422.
  18. Krajinovic M, Labuda D, Mathonnet G, Labuda M, Moghrabi A, et al. (2002) Polymorphisms in genes encoding drugs and xenobiotic metabolizing enzymes, DNA repair enzymes, and response to treatment of childhood acute lymphoblastic leukemia. *Clin Cancer Res* 8: 802–810.
  19. Peloso LA, Da Silva ID, De Souza NC, Yamamoto M, Botelho CA, et al. (2007) CYP1A1 polymorphisms modify overall survival in acute myeloid leukemia patients. *Leuk Lymphoma* 48: 1211–1215.
  20. Yang Y, Tian Y, Jin X, Yan C, Jiang F, et al. (2009) A case-only study of interactions between metabolic enzyme polymorphisms and industrial pollution in childhood acute leukemia. *Environ Toxicol Pharmacol* 28: 161–166.
  21. Infante-Rivard C, Krajinovic M, Labuda D, Sinnott D (2000) Parental smoking, CYP1A1 genetic polymorphisms and childhood leukemia (Quebec, Canada). *Cancer Causes Control* 11: 547–553.
  22. Krajinovic M, Richer C, Sinnott H, Labuda D, Sinnott D (2000) Genetic polymorphisms of N-acetyltransferases 1 and 2 and gene-gene interaction in the susceptibility to childhood acute lymphoblastic leukemia. *Cancer Epidemiol Biomarkers Prev* 9: 557–562.
  23. Mathonnet G, Krajinovic M, Labuda D, Sinnott D (2003) Role of DNA mismatch repair genetic polymorphisms in the risk of childhood acute lymphoblastic leukaemia. *Br J Haematol* 123: 45–48.
  24. Krajinovic M, Labuda D, Richer C, Karimi S, Sinnott D (1999) Susceptibility to childhood acute lymphoblastic leukemia: influence of CYP1A1, CYP2D6, GSTM1, and GSTT1 genetic polymorphisms. *Blood* 93: 1496–1501.
  25. Razmkhah F, Pazhakh V, Zaker F, Atashrazm F, Sheikh M (2011) Frequency of CYP1A1\*2C polymorphism in patients with leukemia in the Iranian population. *Lab Med* 42: 220–223.
  26. Gao J, Huang Y, Liang J, Fang X (2003) Relationship between genetic polymorphisms of CYP1A1 and ALL. *Chin J Birth Health & Heredity* 11: 21–24.
  27. D'Alo F, Voso MT, Guidi F, Massini G, Scardocci A, et al. (2004) Polymorphisms of CYP1A1 and glutathione S-transferase and susceptibility to adult acute myeloid leukemia. *Haematologica* 89: 664–670.
  28. Gallegos-Arreola MP, Batista-Gonzalez CM, Delgado-Lamas JL, Figuera LE, Puebla-Perez AM, et al. (2004) Cytochrome P4501A1 polymorphism is associated with susceptibility to acute lymphoblastic leukemia in adult Mexican patients. *Blood Cells Mol Dis* 33: 326–329.
  29. Joseph T, Kusumakumary P, Chacko P, Abraham A, Radhakrishna Pillai M (2004) Genetic polymorphism of CYP1A1, CYP2D6, GSTM1 and GSTT1 and susceptibility to acute lymphoblastic leukaemia in Indian children. *Pediatr Blood Cancer* 43: 560–567.
  30. Selvin S (2004) Cytochrome P450 1A1 polymorphism and childhood leukemia: an analysis of matched pairs case-control genotype data. *Cancer Epidemiol Biomarkers Prev* 13: 1371–1374.
  31. Majumdar S, Mondal BC, Ghosh M, Dey S, Mukhopadhyay A, et al. (2008) Association of cytochrome P450, glutathione S-transferase and N-acetyl transferase 2 gene polymorphisms with incidence of acute myeloid leukemia. *Eur J Cancer Prev* 17: 125–132.
  32. Lee KM, Ward MH, Han S, Ahn HS, Kang HJ, et al. (2009) Paternal smoking, genetic polymorphisms in CYP1A1 and childhood leukemia risk. *Leuk Res* 33: 250–258.
  33. Yamaguti GG, Lourenco GJ, Costa FF, Lima CS (2009) High risk of 'de novo' acute myeloid leukaemia in individuals with cytochrome P450 A1 (CYP1A1) and NAD(P)H:quinone oxidoreductase 1 (NQO1) gene defects. *Eur J Haematol* 83: 270–272.
  34. Yamaguti GG, Lourenco GJ, Silveira VS, Tone LG, Lopes LF, et al. (2010) Increased risk for acute lymphoblastic leukemia in children with cytochrome P450A1 (CYP1A1)- and NAD(P)H:quinone oxidoreductase 1 (NQO1)-inherited gene variants. *Acta Haematol* 124: 182–184.
  35. Swinney RM, Beuten J, Collier AB, 3rd, Chen TT, Winick NJ, et al. (2011) Polymorphisms in CYP1A1 and ethnic-specific susceptibility to acute lymphoblastic leukemia in children. *Cancer Epidemiol Biomarkers Prev* 20: 1537–1542.
  36. Kim HN, Kim NY, Yu L, Tran HT, Kim YK, et al. (2012) Association of GSTT1 polymorphism with acute myeloid leukemia risk is dependent on smoking status. *Leuk Lymphoma* 53: 681–687.
  37. Thakkinstant A, McElduff P, D'Este C, Duffy D, Attia J (2005) A method for meta-analysis of molecular association studies. *Stat Med* 24: 1291–1306.
  38. Tobias A (1999) Assessing the influence of a single study in the meta-analysis estimate. *Stata Techn Bull* 8: 15–17.
  39. Zhuo WL, Zhang YS, Wang Y, Zhuo XL, Zhu B, et al. (2009) Association studies of CYP1A1 and GSTM1 polymorphisms with esophageal cancer risk: evidence-based meta-analyses. *Arch Med Res* 40: 169–179.
  40. Sergentanis TN, Economopoulos KP, Choussein S, Vlahos NF (2012) Cytochrome P450 1A1 (CYP1A1) gene polymorphisms and cervical cancer risk: a meta-analysis. *Mol Biol Rep*.
  41. Zhan P, Wang Q, Qian Q, Wei SZ, Yu LK (2011) CYP1A1 MspI and exon7 gene polymorphisms and lung cancer risk: an updated meta-analysis and review. *J Exp Clin Cancer Res* 30: 99.
  42. Zheng Y, Wang JJ, Sun L, Li HL (2012) Association between CYP1A1 polymorphism and colorectal cancer risk: a meta-analysis. *Mol Biol Rep* 39: 3533–3540.
  43. Sergentanis TN, Economopoulos KP (2010) Four polymorphisms in cytochrome P450 1A1 (CYP1A1) gene and breast cancer risk: a meta-analysis. *Breast Cancer Res Treat* 122: 459–469.
  44. Zhuo WL, Wang Y, Zhuo XL, Zhu B, Zhu Y, et al. (2009) Polymorphisms of CYP1A1 and GSTM1 and laryngeal cancer risk: evidence-based meta-analyses. *J Cancer Res Clin Oncol* 135: 1081–1090.
  45. Shaik AP, Jamil K, Das P (2009) CYP1A1 polymorphisms and risk of prostate cancer: a meta-analysis. *Urol J* 6: 78–86.
  46. Guo R, Guo X (2012) Quantitative assessment of the associations between CYP1A1 polymorphisms and gastric cancer risk. *Tumour Biol*.
  47. Zhang YD, Tan LN, Zhang XL, Wei HY, Xiong H, et al. (2011) Meta-analysis of cytochrome P4501A1 MspI gene polymorphism and childhood acute leukemia. *Biomed Environ Sci* 24: 683–687.
  48. Bhatia S, Sather HN, Heerema NA, Trigg ME, Gaynon PS, et al. (2002) Racial and ethnic differences in survival of children with acute lymphoblastic leukemia. *Blood* 100: 1957–1964.
  49. Hunger SP, Raetz EA, Loh ML, Mullighan CG (2011) Improving outcomes for high-risk ALL: translating new discoveries into clinical care. *Pediatr Blood Cancer* 56: 984–993.
  50. Castro-Jimenez MA, Orozco-Vargas LC (2011) Parental exposure to carcinogens and risk for childhood acute lymphoblastic leukemia, Colombia, 2000–2005. *Prev Chronic Dis* 8: A106.
  51. Shu XO, Perentesis JP, Wen W, Buckley JD, Boyle E, et al. (2004) Parental exposure to medications and hydrocarbons and ras mutations in children with acute lymphoblastic leukemia: a report from the Children's Oncology Group. *Cancer Epidemiol Biomarkers Prev* 13: 1230–1235.
  52. MacArthur AC, McBride ML, Spinelli JJ, Tamaro S, Gallagher RP, et al. (2008) Risk of childhood leukemia associated with parental smoking and alcohol consumption prior to conception and during pregnancy: the cross-Canada childhood leukemia study. *Cancer Causes Control* 19: 283–295.
